# Supplementary material for: Searching for an optimal AUC estimation method: a never-ending task?
Source: PubMed Central journal article supplement (PMC4225057; doi:10.1007/s10928-014-9392-y), 2014-10-15
Supplement: 10928_2014_9392_MOESM1_ESM.pdf [file 10928_2014_9392_MOESM1_ESM.pdf]

---

# All Figures for Model 1

Supplementary material to a paper entitled: Searching for an optimal AUC estimation method – a never-ending task? by Wojciech Jawień, Jagiellonian University in Kraków, Poland.

This file contains plots for each combination of sample size and  $c_v$  for Model 1. Color version of spaghetti plots for  $n = 4$  and  $c_v = 5\%$  across all models is also included.

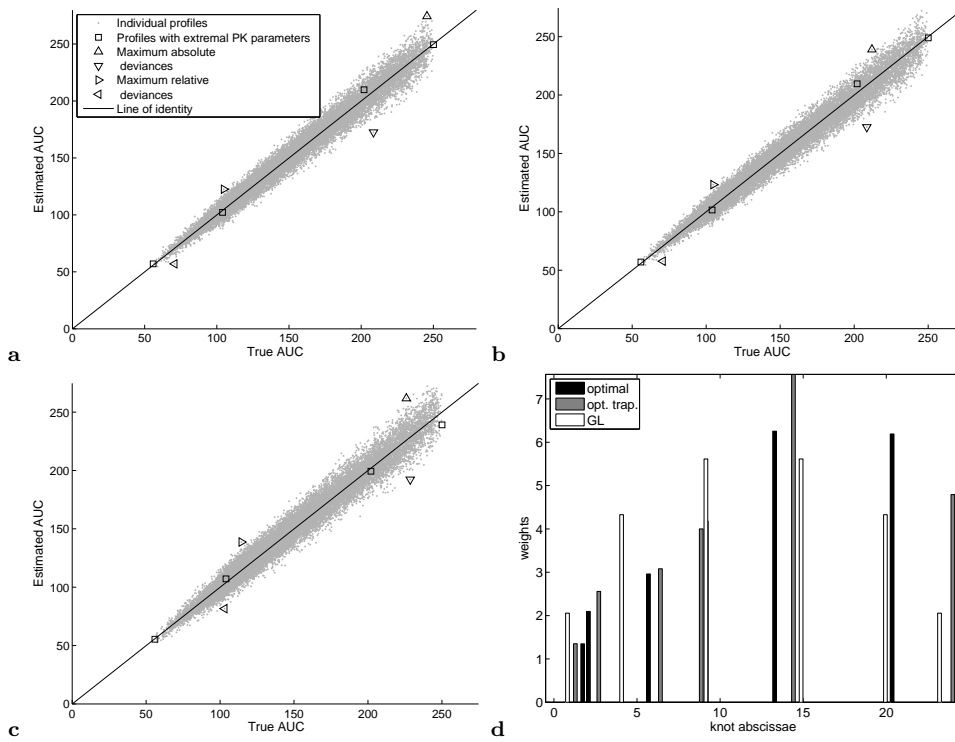

**Fig. 1** Performance of the investigated methods for Model 1 with the relative risk,  $n=6$  and  $c_v=0.10$ . **a-c:** true vs estimated AUC by optimal, optimal trapezoid and GL or CC method, respectively; **d:** knots and weights of these methods.

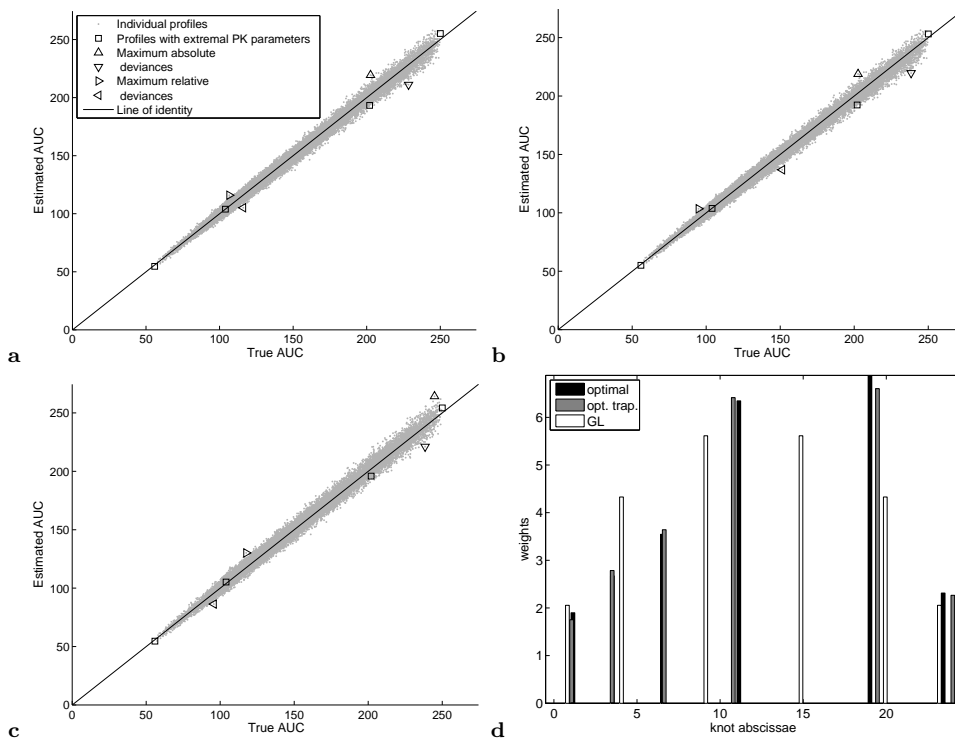

**Fig. 2** Performance of the investigated methods for Model 1 with the relative risk,  $n=6$  and  $c_v=0.05$ . **a-c:** true vs estimated AUC by optimal, optimal trapezoid and GL or CC method, respectively; **d:** knots and weights of these methods.

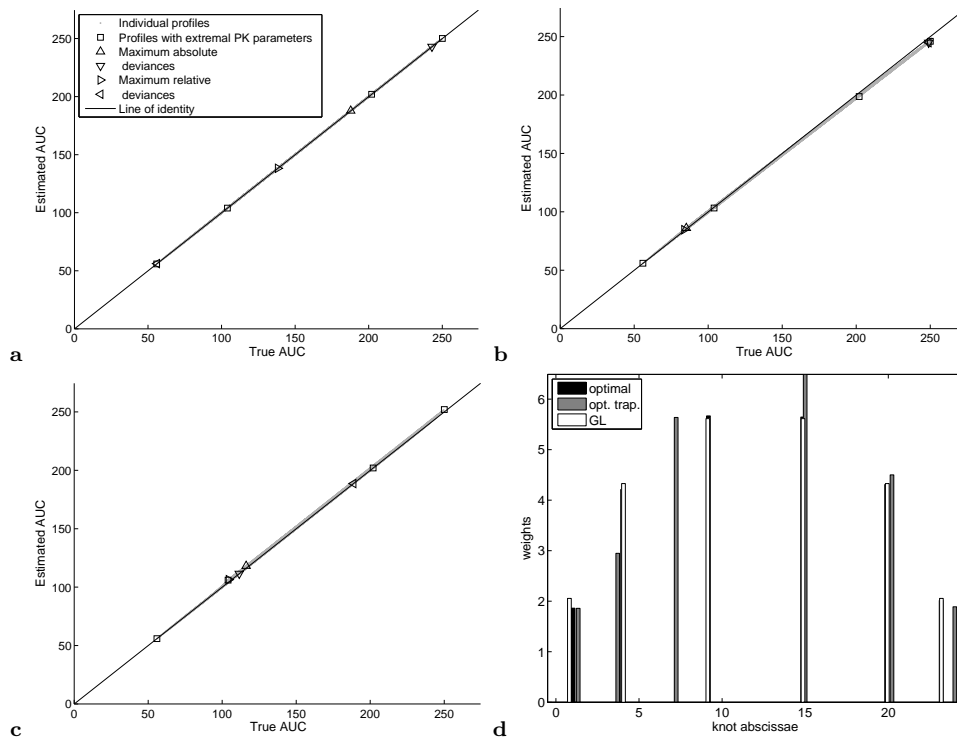

**Fig. 3** Performance of the investigated methods for Model 1 with the relative risk,  $n=6$  and  $c_v=0$  (no random error). **a-c:** true vs estimated AUC by optimal, optimal trapezoid and GL or CC method, respectively; **d:** knots and weights of these methods.

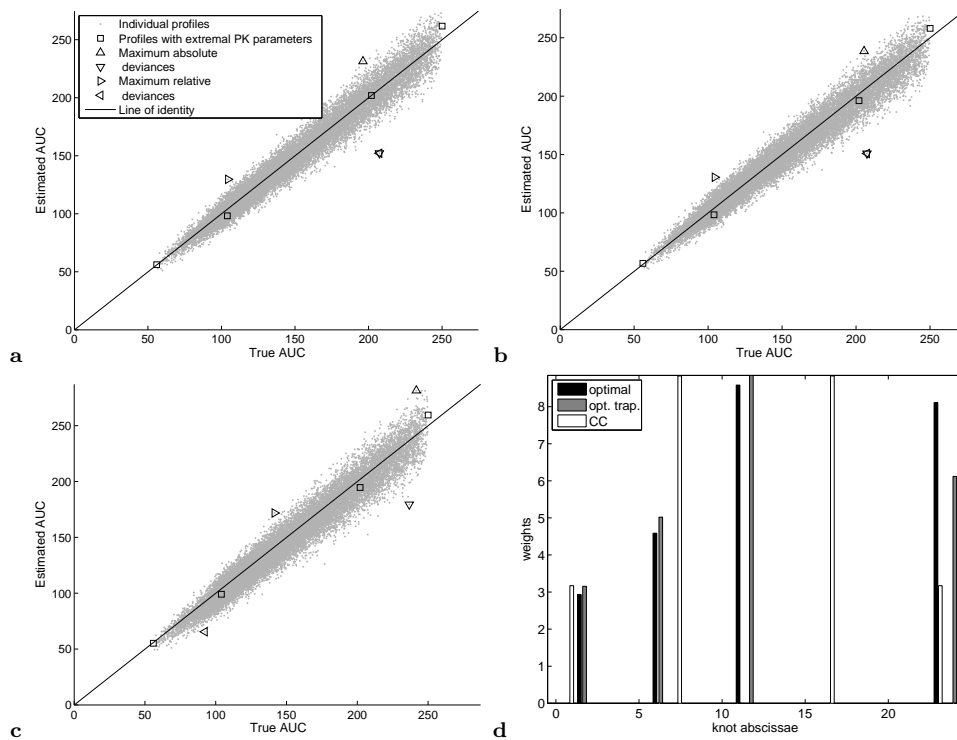

**Fig. 4** Performance of the investigated methods for Model 1 with the relative risk,  $n=4$  and  $c_v=0.10$ . **a-c:** true vs estimated AUC by optimal, optimal trapezoid and GL or CC method, respectively; **d:** knots and weights of these methods.

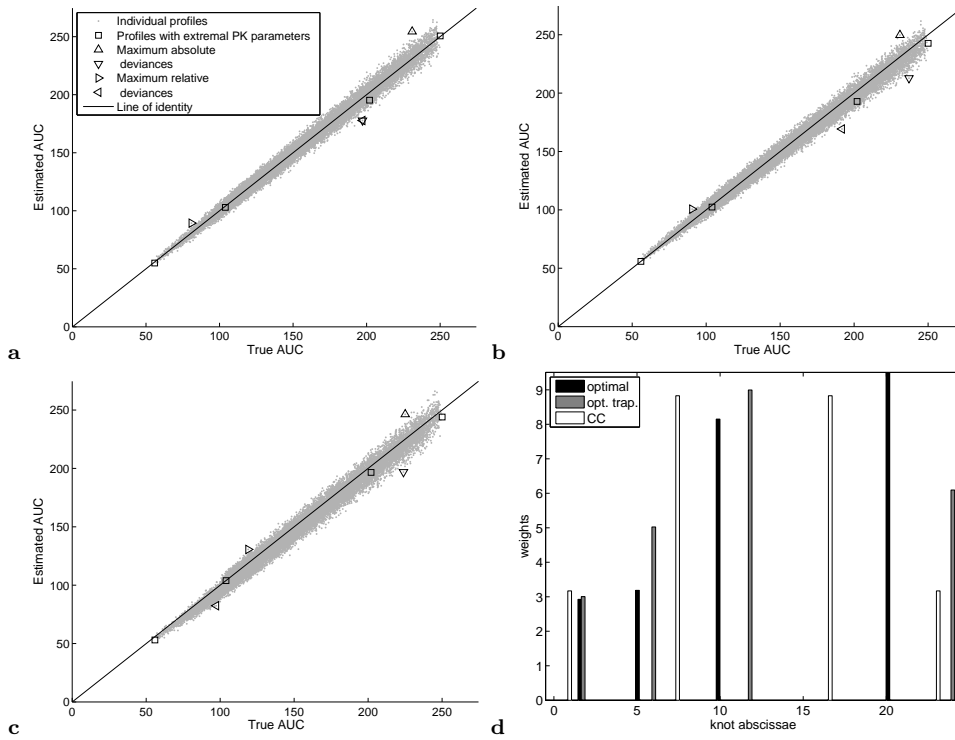

**Fig. 5** Performance of the investigated methods for Model 1 with the relative risk,  $n=4$  and  $c_v=0.05$ . **a-c:** true vs estimated AUC by optimal, optimal trapezoid and GL or CC method, respectively; **d:** knots and weights of these methods.

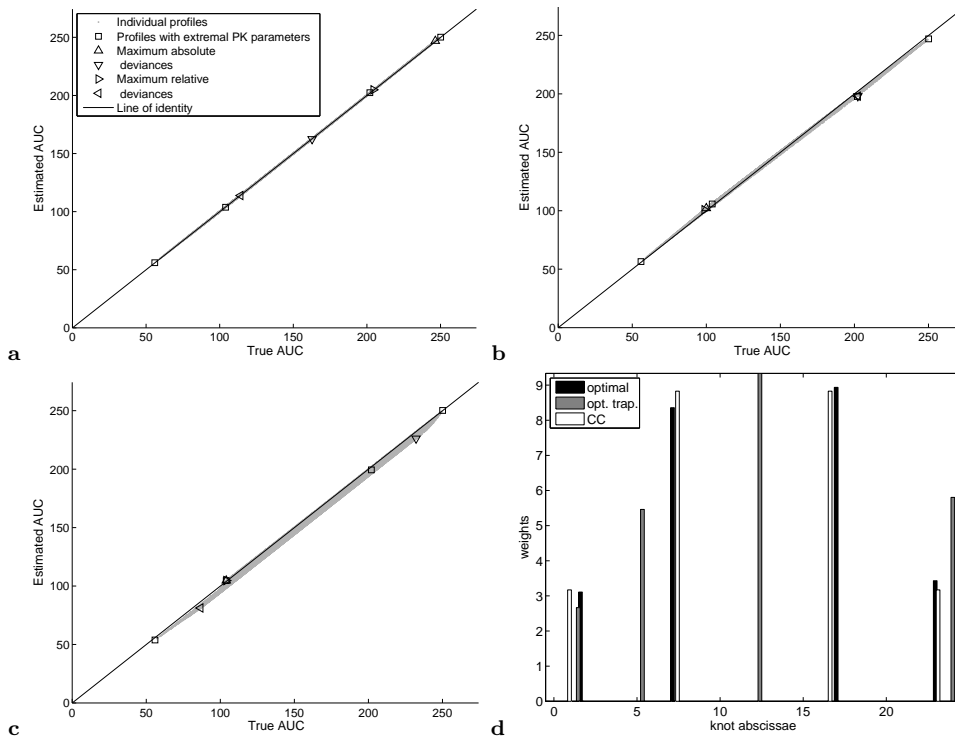

**Fig. 6** Performance of the investigated methods for Model 1 with the relative risk,  $n=4$  and  $c_v=0$  (no random error). **a-c:** true vs estimated AUC by optimal, optimal trapezoid and GL or CC method, respectively; **d:** knots and weights of these methods.

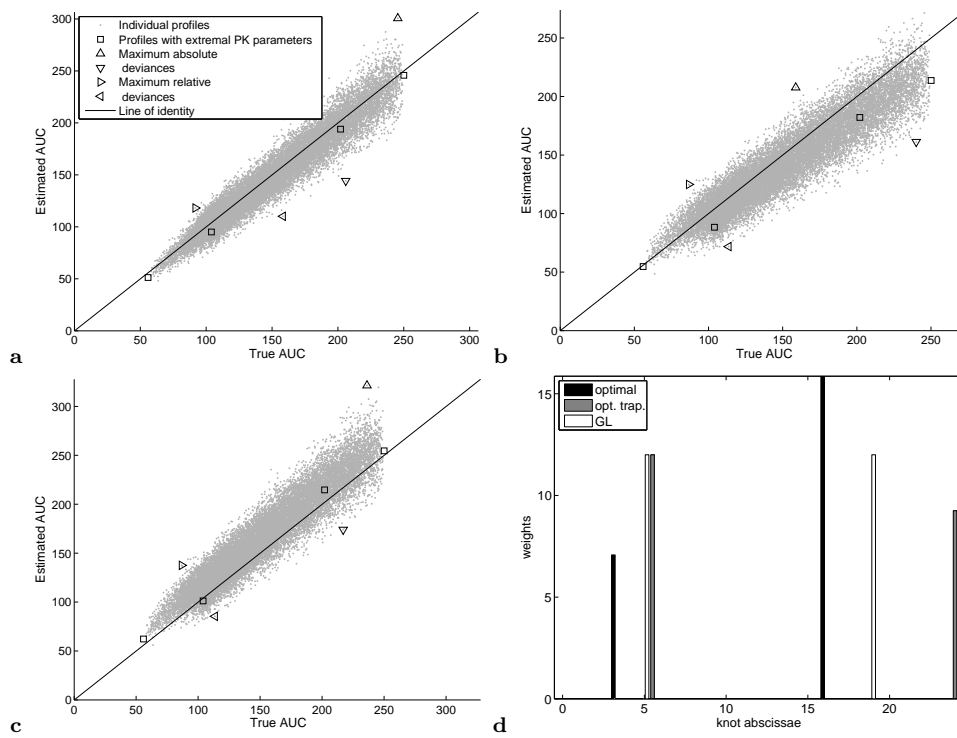

**Fig. 7** Performance of the investigated methods for Model 1 with the relative risk,  $n=2$  and  $c_v=0.10$ . **a-c:** true vs estimated AUC by optimal, optimal trapezoid and GL or CC method, respectively; **d:** knots and weights of these methods.

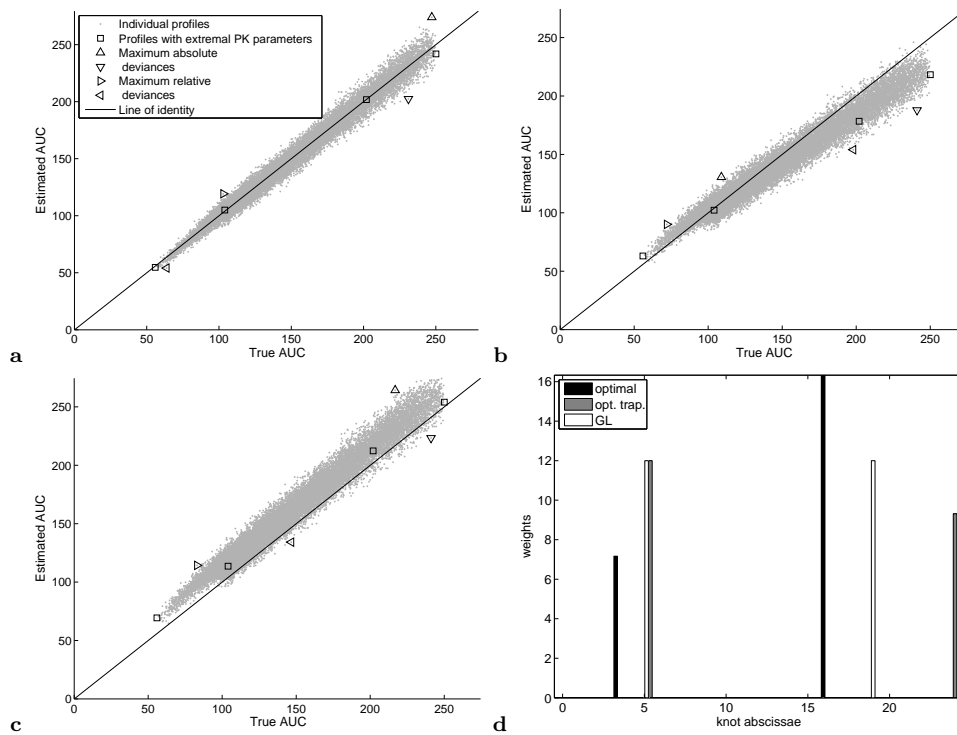

**Fig. 8** Performance of the investigated methods for Model 1 with the relative risk,  $n=2$  and  $c_v=0.05$ . **a-c:** true vs estimated AUC by optimal, optimal trapezoid and GL or CC method, respectively; **d:** knots and weights of these methods.

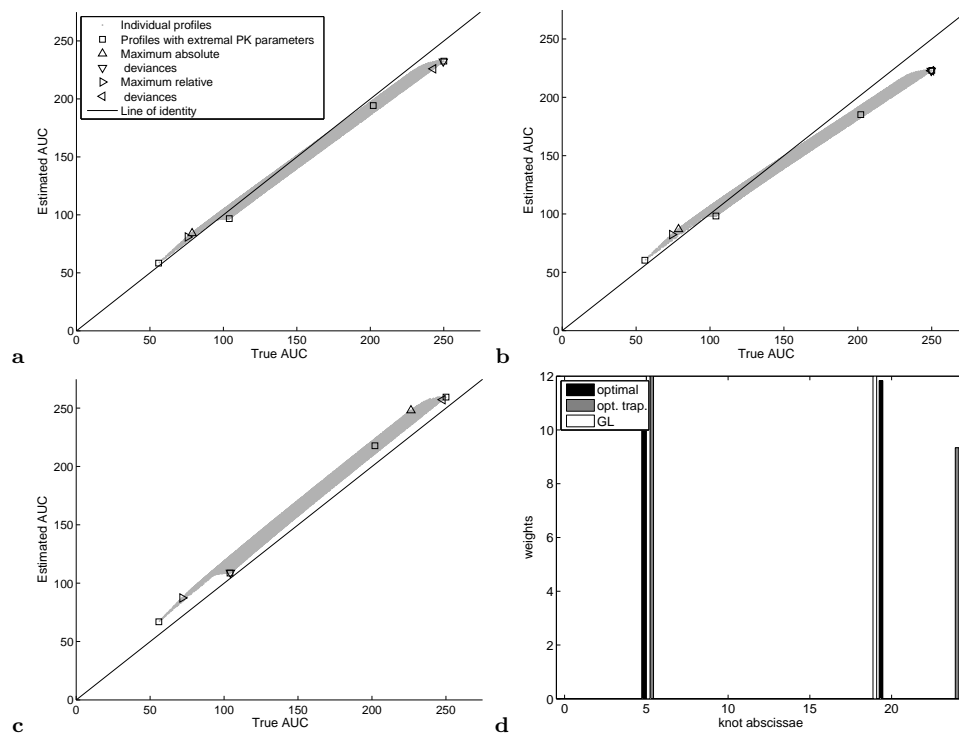

**Fig. 9** Performance of the investigated methods for Model 1 with the relative risk,  $n=2$  and  $c_v=0$  (no random error). **a-c**: true vs estimated AUC by optimal, optimal trapezoid and GL or CC method, respectively; **d**: knots and weights of these methods.

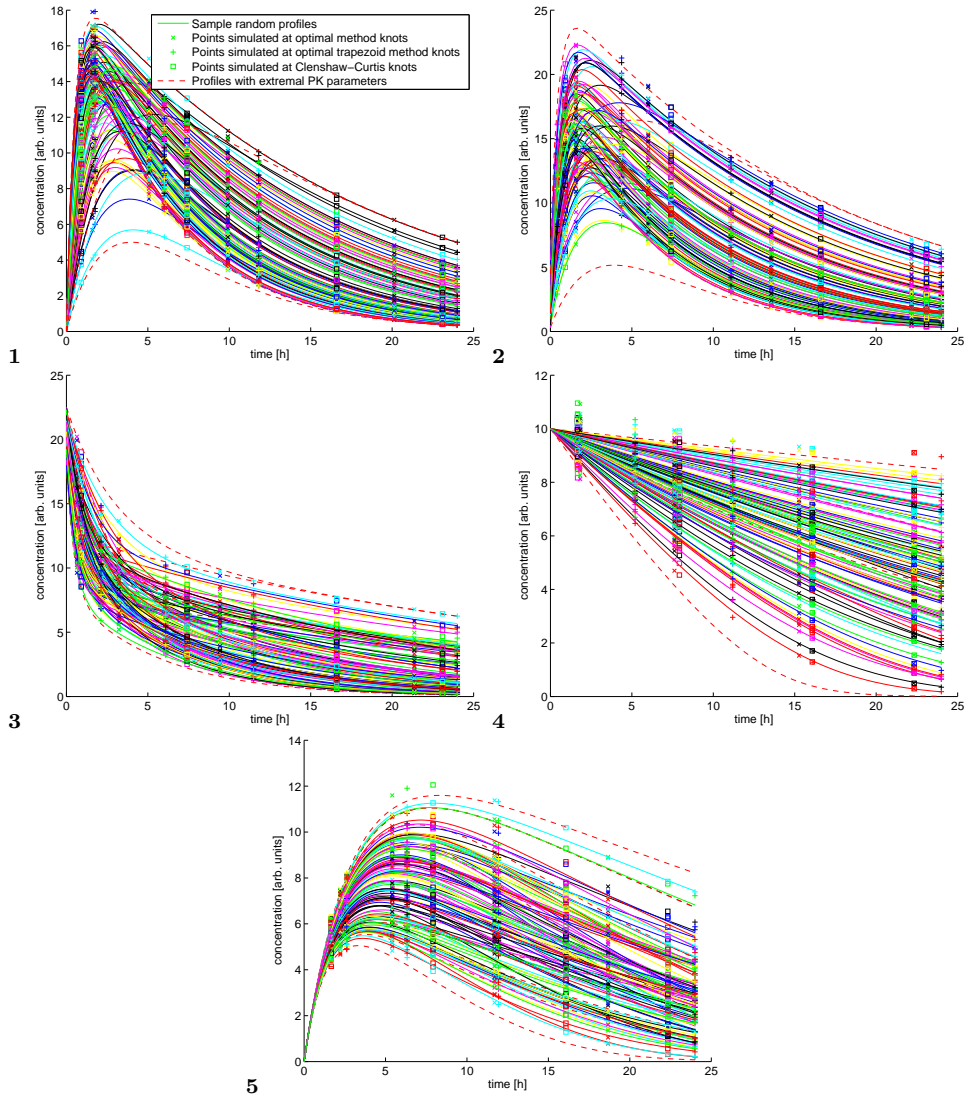

Fig. 10 Spaghetti plots for  $n = 4$  and  $c_v = 5\%$  across models 1–5 with relative risk
